# Supplementary material
Source: publisher figshare collection journal article supplement (https://frontiersin.figshare.com/ndownloader/files/26033450)
Supplement: Supplementary file [file 26033450]

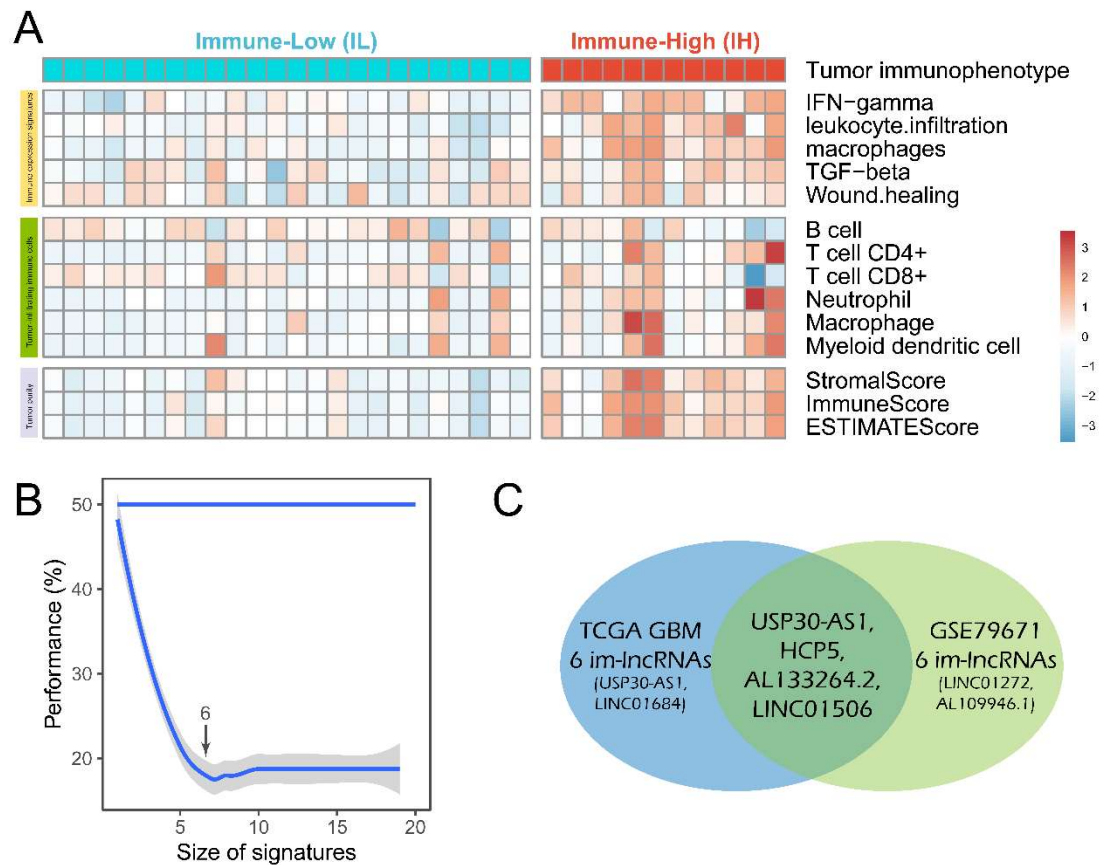

Supplementary Figure 1 The robust validation of im-lncRNAs in GSE79671. (A) The immunophenotypes of tumor samples in GSE79671. (B) The evaluation of model BER performance in GSE79671. (C) Venn diagram showing the number of intersections of im-lncRNAs between the TCGA GBM cohort and the GSE79671.
